# Supplementary material for: How lasing happens in CsPbBr3 perovskite nanowires
Source: PubMed Central journal article supplement (PMC6335413; doi:10.1038/s41467-018-07972-7), 2019-01-16
Supplement: 41467_2018_7972_MOESM1_ESM.pdf [file 41467_2018_7972_MOESM1_ESM.pdf]

## **Supplementary Information**

**How Lasing Happens in CsPbBr<sub>3</sub> Perovskite Nanowires**

**Schlaus et al.**

1 **How Lasing Happens in CsPbBr<sub>3</sub> Perovskite Nanowires Supplementary Information**

2 Andrew P. Schlaus, Michael S. Spencer, Kiyoshi Miyata, Fang Liu, Xiaoxia Wang, Ipshita  
3 Datta, Michal Lipson, Anlian Pan, X-Y. Zhu

4

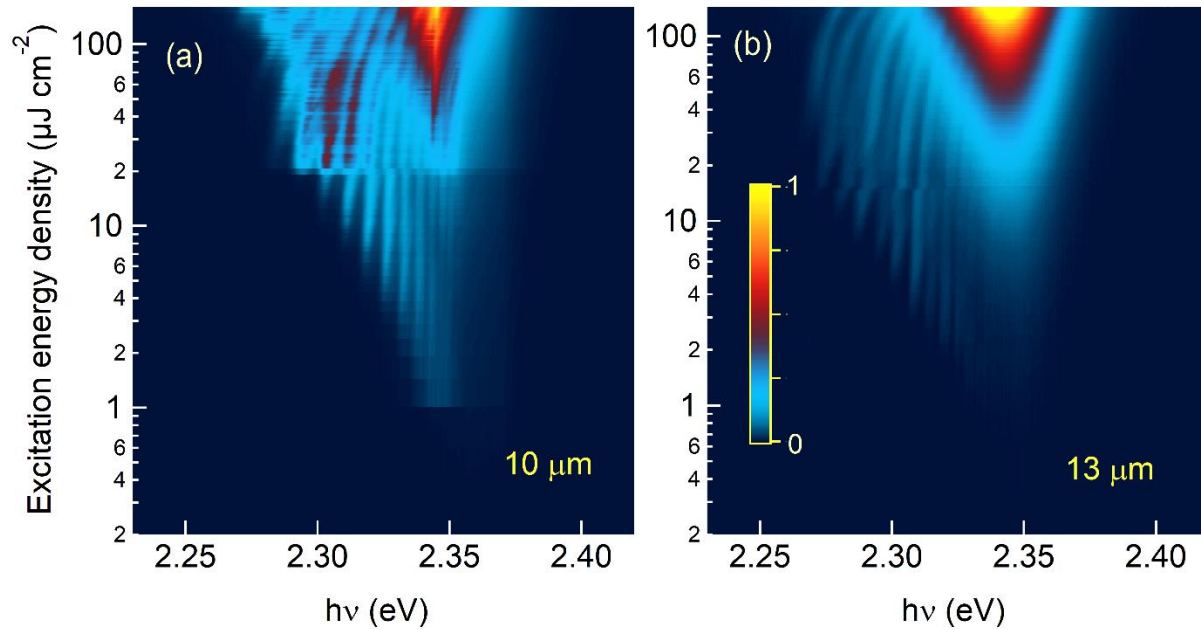

5

6 **Supplementary Figure 1. Excitation density dependent lasing spectra of two nanowires in**  
7 **the lasing and saturation regions.** The lengths of the nanowires are (a) 10  $\mu\text{m}$  and (b) 13  $\mu\text{m}$ . All  
8 spectra obtained under the same conditions as those in the main text. Each sample was uniformly  
9 excited at  $h\nu = 3.0$  eV at a substrate temperature of 80 K.

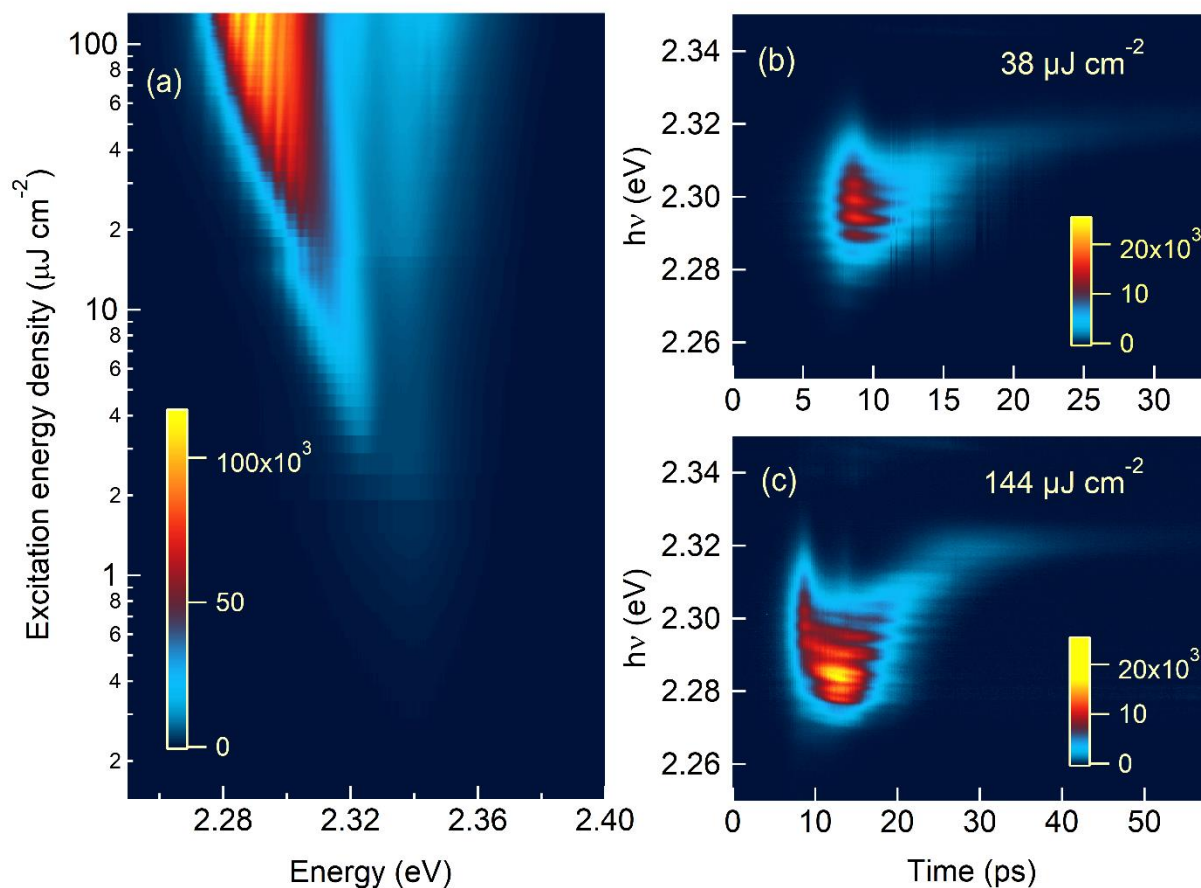

10

11 **Supplementary Figure 2. Excitation density dependent and time-resolved lasing spectra of a**  
 12 **microplate ( $3.5 \times 13\mu\text{m}$ ).** (a) Time-integrated emission spectrum as a function of excitation  
 13 energy density. (b-c) Time-resolved emission spectrum at excitation energy densities of  $\rho = 38$   
 14 and  $144 \mu\text{J cm}^{-2}$ . All spectra obtained under the same conditions as those in the main text. Each  
 15 sample was uniformly excited at  $h\nu = 3.0 \text{ eV}$  at a substrate temperature of 80 K.

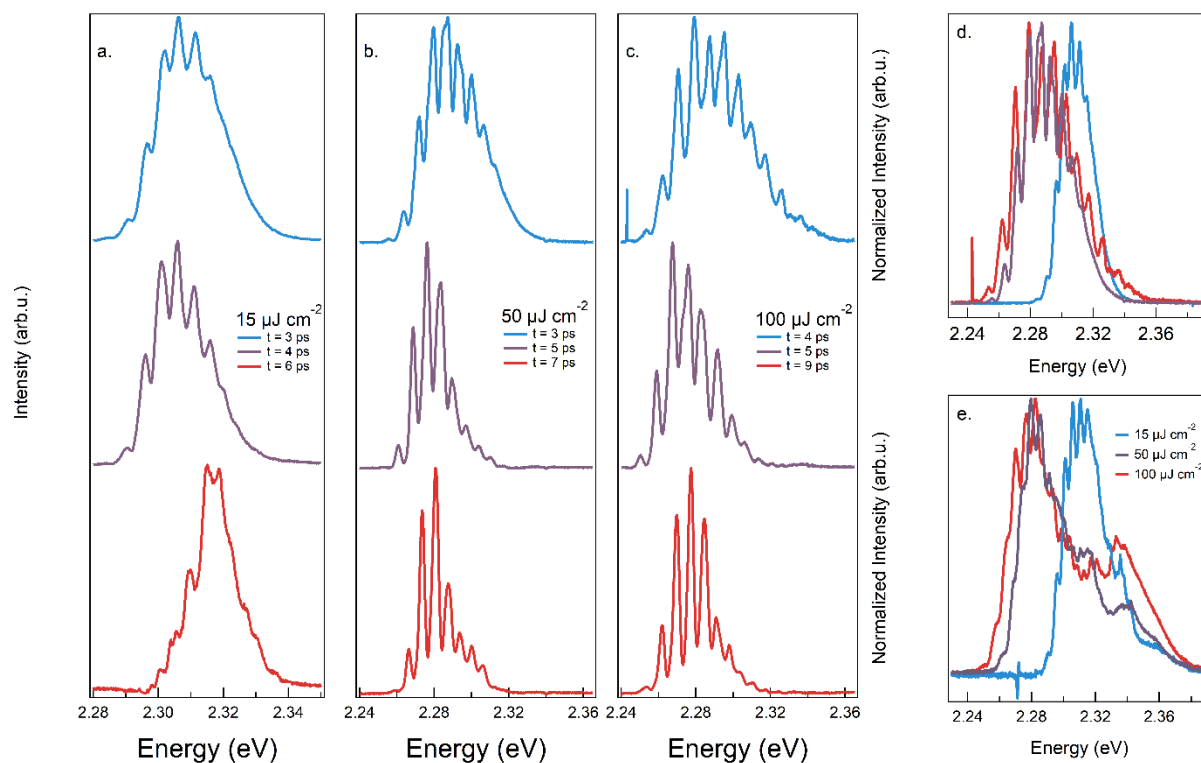

16

17 **Supplementary Figure 3. Sample lasing spectra at selected delay times and excitation**  
 18 **densities.** Panels a,b,c display line cuts at three excitation densities from the 2D pseudo color plots  
 19 in Fig 3 in the main text. The first line cut is taken at delay time when the spectrum is broadest,  
 20 with subsequent line cuts demonstrating spectral narrowing. The top line cuts from a,b, and c are  
 21 displayed on top of each other in d for comparison. Panel e shows time-integrated spectra from the  
 22 three sets of time-resolved spectra.

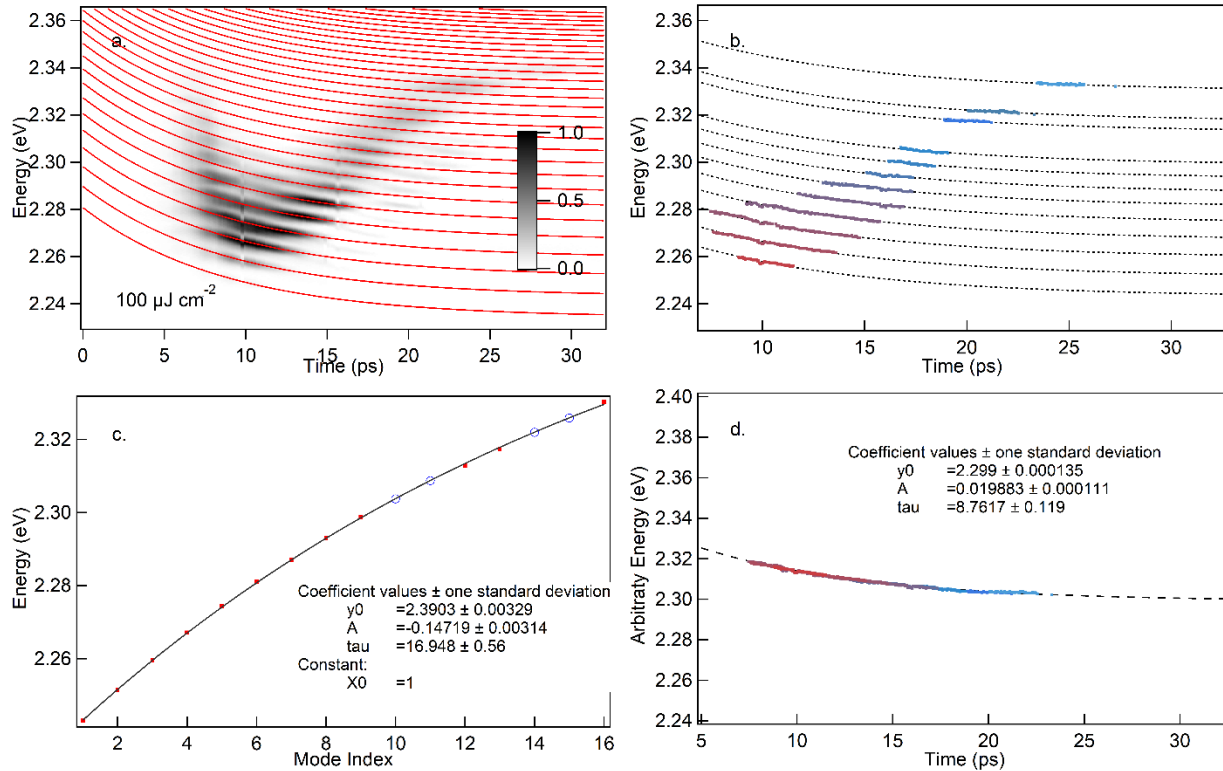

23

24 **Supplementary Figure 4. Extracting laser gain profiles and mode energies.** (a) Overlay of the  
 25 numeric temporal photonic mode profiles with the lasing spectrum at  $100 \mu\text{J cm}^{-2}$  excitation energy  
 26 density. (b) Results of the numeric image analysis where the coloured curves indicate the resulting  
 27 traces of the numeric image analysis, along with the black dashed curves which represent the fit  
 28 of their temporal profile based off the global fit done in (d). (c) Fit of the free spectral range in the  
 29 energy region around the gain profile. (d) Numerically extracted lasing mode energies from all the  
 30 lasing modes (color dots), with the time evolution of each mode shifted horizontally until all data  
 31 sets fall on the same curve. Globally fit to all the data points is shown as the dashed curve.

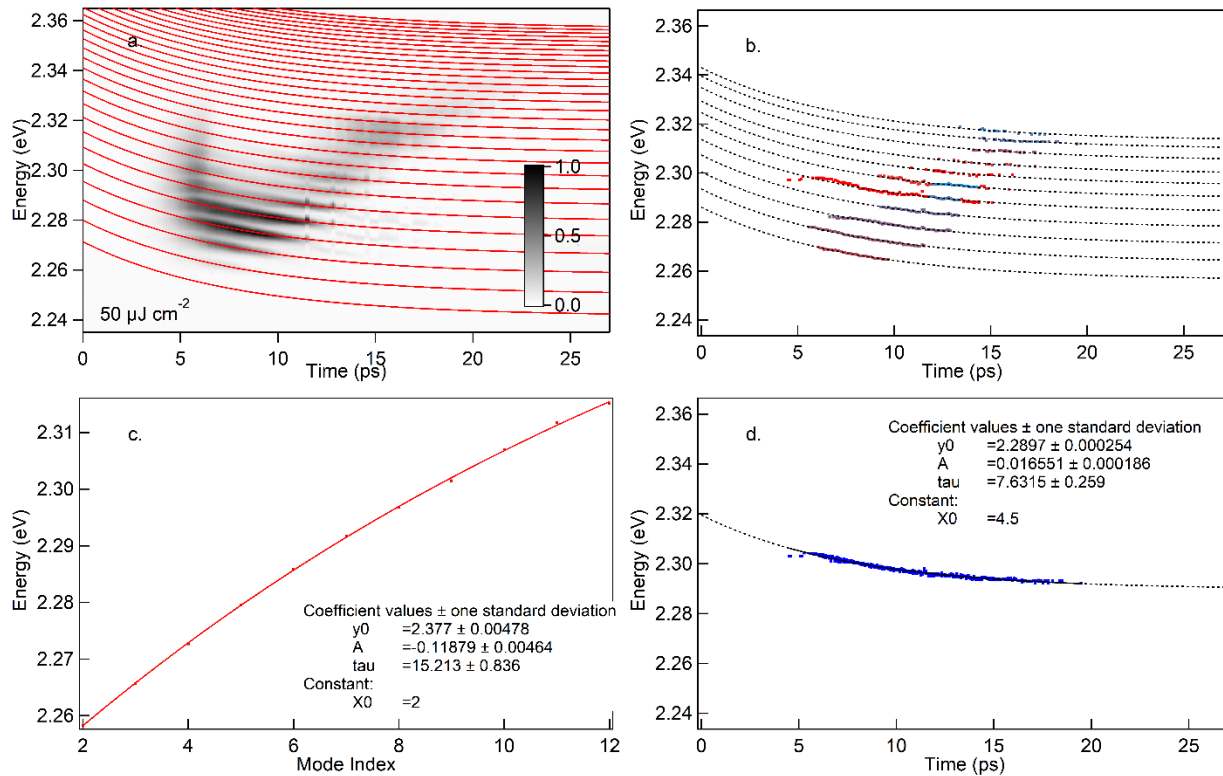

32

33 **Supplementary Figure 5. Extracting laser gain profiles and mode energies.** (a) Overlay of the  
 34 numeric temporal photonic mode profiles with the lasing spectrum at  $50 \mu\text{J cm}^{-2}$  excitation energy  
 35 density. (b) Results of the numeric image analysis where the coloured curves indicate the resulting  
 36 traces of the numeric image analysis, along with the black dashed curves which represent the fit  
 37 of their temporal profile based off the global fit done in (d). (c) Fit of the free spectral range in the  
 38 energy region around the gain profile. (d) Numerically extracted lasing mode energies from all the  
 39 lasing modes (color dots), with the time evolution of each mode shifted horizontally until all data  
 40 sets fall on the same curve. Globally fit to all the data points is shown as the dashed curve.

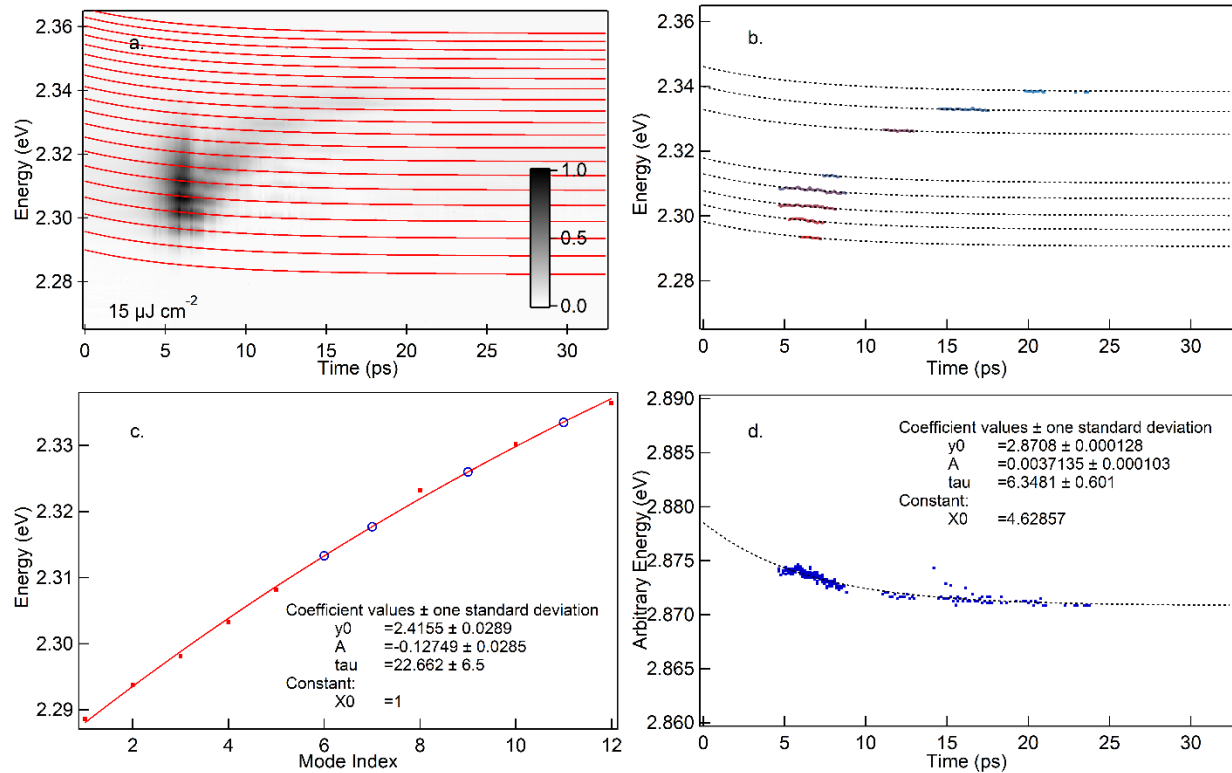

41

42 **Supplementary Figure 6. Extracting laser gain profiles and mode energies.** (a) Overlay of the  
 43 numeric temporal photonic mode profiles with the lasing spectrum at  $15 \mu\text{J cm}^{-2}$  excitation energy  
 44 density. (b) Results of the numeric image analysis where the coloured curves indicate the resulting  
 45 traces of the numeric image analysis, along with the black dashed curves which represent the fit  
 46 of their temporal profile based off the global fit done in (d). (c) Fit of the free spectral range in the  
 47 energy region around the gain profile. (d) Numerically extracted lasing mode energies from all the  
 48 lasing modes (color dots), with the time evolution of each mode shifted horizontally until all data  
 49 sets fall on the same curve. Globally fit to all the data points is shown as the dashed curve.

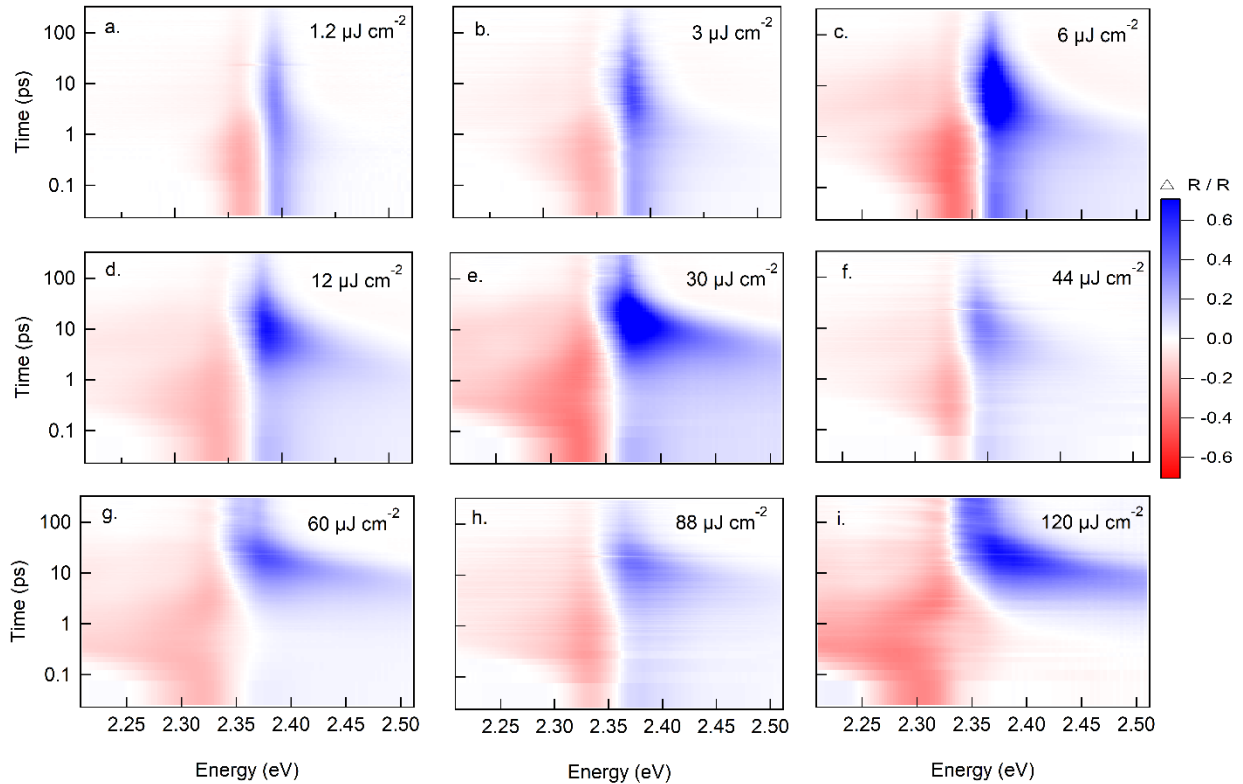

50

51 **Supplementary Figure 7. Transient reflectance spectra.** Complete set of ultrafast transient  
 52 reflectance spectra at excitation photon energy of 3.1 eV and a sample temperature of 80 K. The  
 53 range of excitation energy density spans from below lasing threshold (a), to the lasing threshold  
 54 (b), lasing region (c) and (d), the saturation threshold (e), and the saturation region (f) - (i). Panels  
 55 (a),(c),(e),and (i) are the same panels that appeared in Fig 4 in the main text.

56



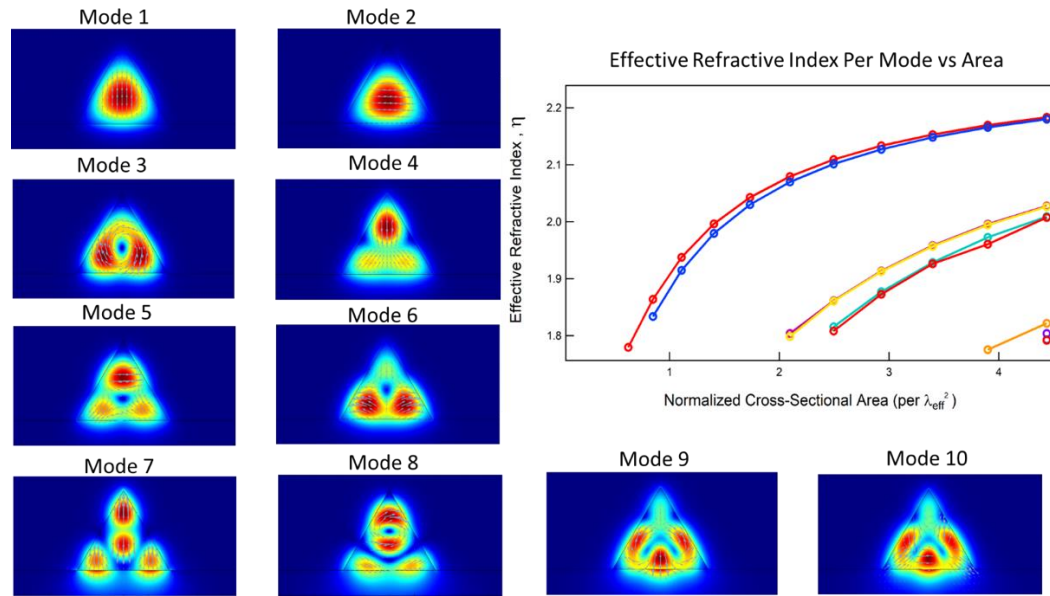

57  
 58 **Supplementary Figure 8. Numerical simulation of wave-guiding modes in an idealized**  
 59 **nanowire.** We carried out the simulation using the finite difference method within the COMSOL  
 60 package. The nanowire cross section was assumed to be an equilateral triangle, with a side-length  
 61 of 400nm. An refractive index of  $n=2.3$  was used for the CsPbBr<sub>3</sub> nanowire and  $n=1.765$  for the  
 62 sapphire substrate below the nanowire. At this size, there are ten optical modes supported, and  
 63 their electric field profiles and polarizations (cyan vectors) are depicted in the images. Also shown  
 64 are the effective refractive indexes as a function of nanowire cross sectional area, showing the  
 65 increasing degree of confinement of the lowest-order modes as the nanowire size increases.

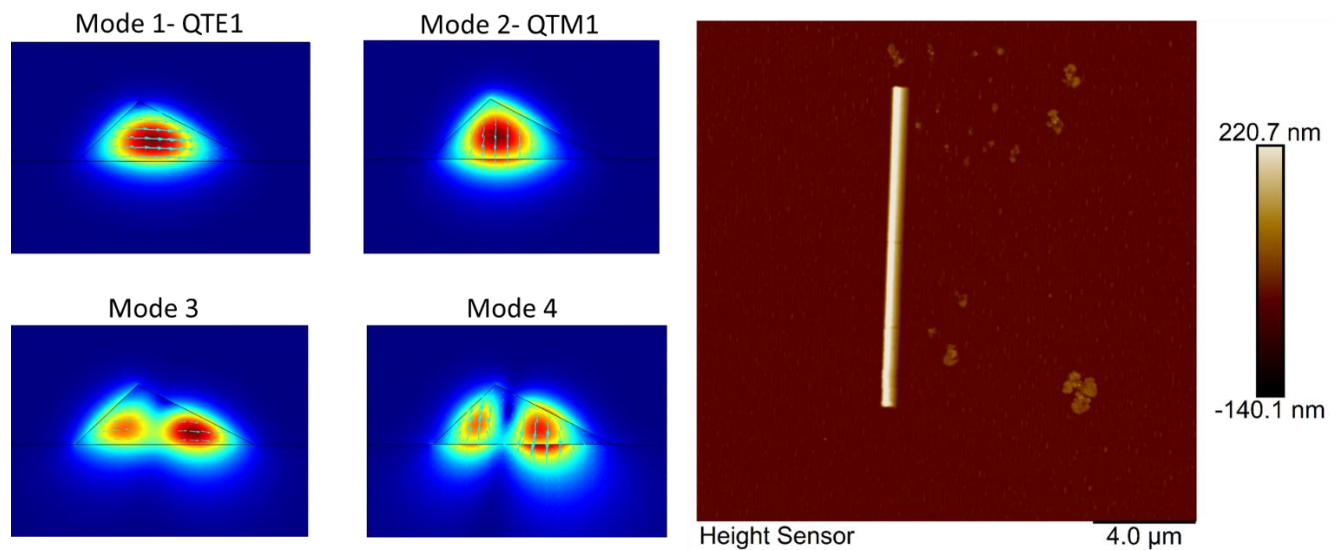

66

67 **Supplementary Figure 9. Numerical simulation of wave-guiding modes in the actual**  
68 **nanowire.** AFM image of the actual triangular nanowire is shown on the right. We carried out the  
69 finite difference simulation based on the experimental nanowire geometry. The first four solutions:  
70 quasi-transverse electric mode (Mode 1- QTE1), quasi-transverse magnetic mode (Mode 2-  
71 QTM1), higher order modes without trivial polarization (Mode 3 & Mode 4). Compared to the  
72 idealized equilateral triangular shape in Fig. S8, the lower symmetry in the modes results from the  
73 lower symmetry of the actual nanowire. The reduced spatial volume of the nanowire leads to more  
74 leaking out of the electric field. The fundamental optical mode (Mode 1) and is likely the mode  
75 responsible for lasing<sup>1</sup>.

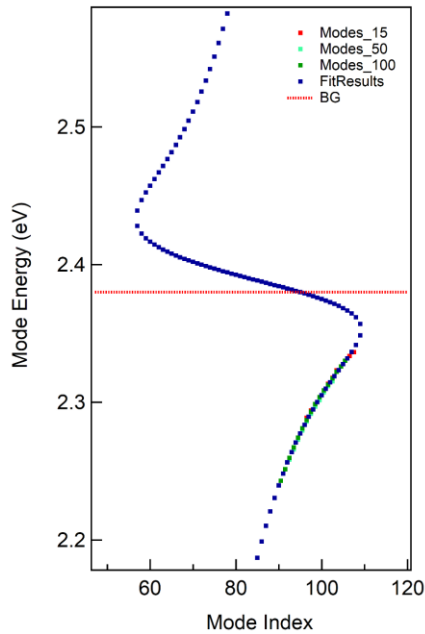

76

77 **Supplementary Figure 10. Dielectric analysis of Fabry-Perot cavity modes.** The dots are  
78 from the single Lorentzian oscillator model and other colored dots are experimental data points.  
79 The red-dotted line is resonant energy.

80

### 81 **Supplementary Note 1. Data of lasing spectra from other representative NWs**

82 For both nanowires presented in Supplementary Figure 1, we observe the same characteristics as  
83 those in Fig. 2 in the main text. These include the appearance of lasing threshold at excitation  
84 energy densities in  $\mu\text{J}/\text{cm}^2$  region, the saturation threshold at  $10\text{s } \mu\text{J}/\text{cm}^2$ , the narrowing followed

85 by blue-shift of gain profile with time, and the red-shift of each lasing mode with time. The change  
86 in spectral profile with nanowire length is determined by the Fabre-Perot cavity modes, equation  
87 (2) in main text. This leads to the inverse dependence of mode spacing on cavity length,  $\Delta E =$   
88  $\frac{hC}{2n(\omega)}L^{-1}$ , where  $h$  is Planck's constant,  $C$  is the speed of light,  $n$  is the refractive index (which  
89 depends on  $\omega$ ), and  $L$  is the length of the cavity (i.e., the nanowire). In agreement with this  
90 relationship, we find that mode spacing is smaller for longer  $L$  in Supplementary Figure 1.

91 The lasing spectral evolution from the microplate shows similar features as characteristic of that  
92 from the nanowires. These include the increasing spectral range and the red-shifting in the peak  
93 lasing position with excitation density in Supplementary Figure 2a, the initial narrowing followed  
94 by blue-shifting in laser gain profile with time in Supplementary Figure 2b&c, and the red-shifting  
95 of each mode with time or decreasing density in all three panels. For the microplate sample, the  
96 saturation threshold for lasing is not reached within the excitation density range investigated.

### 97 **Supplementary Note 2. Sample lasing spectra from NWs at selected delay times**

98 At excitation densities above the lasing thresholds, the narrowing of the lasing spectra takes longer  
99 time at higher initial excitation densities, Supplementary Figure 3a, b, c. A comparison of the  
100 initial broad lasing spectra at different excitation densities reveals the red-shift with carrier density,  
101 as determined by the density-dependent plasmon frequency, in agreement with excitation density  
102 dependent lasing spectra in Fig. 2 in the main text. The time integrated spectra in Supplementary  
103 Figure 3e illustrate the spectral congestion due to time-dependent red-shifts in each cavity mode  
104 attributed to changes in the refractive index with excitation density.

105

### 106 **Supplementary Note 3. Quantitative determination of lasing mode energies**

107 The dielectric function has real and imaginary components. Loss and gain are represented by  
108 positive and negative values respectively in the imaginary component. From our lasing profile we  
109 can extract the time dependent imaginary component of the dielectric function. To do this we use  
110 numeric image analysis, Supplementary Figure 4a, to track the spectral position of each laser mode  
111 over time coloured curves in Supplementary Figure 4b. The shifting of each mode is attributed to  
112 changes in the refractive index. Within experimental energy resolution, each lasing model can be

113 described by the same function of time. Using the overlap of different modes in the energy domain,  
114 we horizontally offset each so they all lay continuously head to tail, as shown as color dots in  
115 Supplementary Figure 4d. Then a single exponential fit is used to globally fit the time-dependent  
116 mode energies over the course of our experiment. Using the fit parameters from the global fit in  
117 Supplementary Figure 4d and the time offset ( $t_0$ ) for each model, we fit each individual mode  
118 profile, dashed lines in Supplementary Figure 4b. From these individual fits, we obtain the intrinsic  
119 mode energies at the extrapolated low carrier density limit. These energies are depicted as red  
120 circles in Supplementary Figure 4c. The a few blue dots are those not well resolved in the  
121 experiment spectra and are interpolated from the fit function. Similar analysis is done for excitation  
122 energy densities at  $50 \mu\text{J cm}^{-2}$  (Supplementary Figure 5) and  $15 \mu\text{J cm}^{-2}$  (Supplementary Figure  
123 6), respectively.

124

#### 125 **Supplementary Note 4. Numerical simulation of wave-guiding modes in nanowires**

126 We carry out optical wave guide analysis in the nanowires using the finite-difference in the  
127 COMSOL software package. The analysis is done with the photon energy relevant to lasing,  $h\nu =$   
128  $2.4 \text{ eV}$ . We carry out simulation for an idealized nanowire of equilateral triangle cross section  
129 (Supplementary Figure 8) and the actual nanowire with the triangle cross section determined  
130 experimentally from atomic force microscopy (AFM) imaging. For the idealized nanowire, we  
131 used large cross sectional sizes of  $5 \mu\text{m}$  to obtain ten optical modes, shown in Supplementary  
132 Figure 8. The number of supported modes decrease as the lateral sizes decrease, as shown in the  
133 plot of the dependence of effective refractive index on the cross sectional area. For the actual  
134 nanowire, we find four modes, shown in Supplementary Figure 9, along with the AFM image.  
135 Within the experimental energy window, we probe the two lowest energy modes (mode 1 and  
136 mode 2) that are nearly degenerate.

137

#### 138 **Supplementary Note 5. Chemical Potentials and Electronic Phase Transitions**

139 We carry out numerical estimation of electronic phases (e.g. exciton/excitonic resonance of free  
140 carriers, non-degenerate electron-hole plasma, degenerate electron-hole plasma) using the  
141 methodology laid out in Versteegh et. al., PRB (2011)<sup>2</sup>. This method allows for a numerical

142 determination of the chemical potential, avoiding the erroneous high- and low-density limit  
 143 expressions for the Mott density. This is achieved by using the definition of the carrier density,  $N$ ,  
 144 in terms of the chemical potential and temperature, for a bulk 3-D material:

$$145 \quad N = \frac{1}{\pi^2} \left( \frac{2m_i}{\hbar^2} \right) \int_0^\infty \frac{\sqrt{E}}{e^{k_b T} + 1} dE \quad \text{Supplementary Equation 1}$$

146 Here,  $i$  stands for index, which can be either the electron or the hole,  $m_i$  is the effective mass,  
 147 taken from Becker et. al., Nature (2018)<sup>3</sup> ( $m_e=0.134 m_o$ ,  $m_h = 0.128m_o$ ,  $\epsilon_r = 4.8$ ),  $\hbar$  is Planck's  
 148 constant,  $k_b$  is Boltzmann's constant,  $T$  is temperature, and  $\mu_i$  is the chemical potential.  
 149 Supplementary Equation 1 is solved for both the electron and the hole effective masses, creating a  
 150 mapping between temperature, electron (hole) chemical potential, and electron (hole) number  
 151 densities. Next, these are used to calculate the plasma screening lengths, according to:

$$152 \quad \lambda_{s,i} = \sqrt{\frac{\epsilon_o \epsilon_r}{e^2}} \sqrt{\frac{\partial \mu_i}{\partial n_i}} \quad \text{Supplementary Equation 2}$$

153 Here,  $\lambda_{s,i}$  is the screening length of a single-component plasma, where once again the  $i$  stands for  
 154 the index of either the electron or the hole,  $\epsilon_o$  is the vacuum permittivity,  $\epsilon_r$  is the static dielectric  
 155 function<sup>3</sup>, and  $e$  is the charge of a single electron. These are both solved, and then their results are  
 156 combined so as to account for a two-component plasma;

$$157 \quad \lambda_s^{-2} = \lambda_{s,e}^{-2} + \lambda_{s,h}^{-2} \quad \text{Supplementary Equation 3.}$$

158 Special care must be taken here so as to ensure that the number of electrons and holes are equal  
 159 throughout, as they are in experiments. To this end, a map is created between the electron and hole  
 160 densities, i.e. for a certain electron chemical potential, a corresponding hole chemical potential  
 161 must be found such that there are equal electron and hole number densities. Then when taking the  
 162 derivatives to generate the plasma screening length, this relationship must be obeyed to generate  
 163 an accurate plasma screening length. The screening lengths are then compared against the  
 164 unscreened exciton Bohr radius. The definition used here of the Mott density is the condition at  
 165 which point the screening length of the plasma becomes shorter than the exciton Bohr radius; at  
 166 this point, the coulomb potential between an unscreened electron-hole bound pair would be  
 167 reduced to 1/e of its original value. It is at this density when the fraction of exciton or excitonic  
 168 resonance rapidly approaches zero. Note that at temperatures above the thermal dissociation

169 energy (~ 340 K here), there are no excitons, even though the screening lengths are very long in  
170 the plasma; instead, free electrons in the conduction band is correlated with free holes in the  
171 valence band in the form of excitonic resonance in optical transition<sup>4</sup>. Above the Mott density, we  
172 refer to the system as either a non-degenerate or a degenerate electron-hole plasma (n-EHP, d-  
173 EHP). The distinction is formally where the de Broglie wavelengths of the electrons and holes are  
174 smaller than their inter-particle separations. This is approximately satisfied at the condition for  
175 population inversion. The final separation in the phase diagram is where the chemical potential  
176 becomes positive, i.e. population inversion is achieved, but we have designated the region by  
177 naming it the d-EHP region.

178 Note that the degenerate plasma is defined as where population inversion is achieved at the band  
179 edge, however through the introduction of mid-gap states, the requirements for population  
180 inversion may be fulfilled at lower carrier densities. The mechanism of the plasmon-assisted lasing  
181 is that a plasmon side-band appears in the electronic structure<sup>5,6</sup>, easing the requirement to achieve  
182 population inversion.

183

#### 184 **Supplementary Note 6. Simulation of transient reflectance spectra**

185 We simulate the reflectance spectrum using  $n$ , and  $k$ , as follows:

$$186 \quad R(\omega) = \frac{((1-n(\omega))^2 + k(\omega)^2)}{((1+n(\omega))^2 + k(\omega)^2)} \text{ Supplementary Equation 4.}$$

187 Then a transient reflectance was generated using the following:

$$188 \quad \Delta R(\omega) = \frac{R_2(\omega) - R_1(\omega)}{R_1(\omega)} \text{ Supplementary Equation 5.}$$

189 To simulate a representative shape for a plasmon reflectance, we chose  $R_2(\omega)$  to have a plasmon  
190 frequency different from one, and for  $R_1(\omega)$  to have no plasmon resonance ( $\omega_p = 1$ ). To simulate  
191 a representative ‘gain’ feature, we changed  $R_2(\omega)$  by replacing  $k(\omega)^2$  throughout by  $-k(\omega)^2$ .

192

#### 193 **Supplementary Note 7. Nonlinear dispersion from the Lorentzian oscillator model**

194 As we discuss in the main text, the nonlinear dispersion with negative curvature can be attributed  
195 to the energy-dependent refractive index, equations 2-4. In our analysis, we found the experimental  
196 data to lie on the computed mode profile with  $\hbar\omega_o = 2.38$  eV,  $\Gamma = 72$  meV, and  $\hbar\omega_p =$   
197 700 meV. Shown below is the mode profile for these conditions, and also the experimental data  
198 points whose mode indexes have been shifted to lie on the curve. The figure in the main paper is  
199 the same, except centered closer around the experimental points. It is important to point out that  
200 the single Lorentzian oscillator model is meant as a qualitative illustration of how the experimental  
201 mode energy dispersion can be described. We do not attempt any quantitative interpretation of the  
202 parameters. In reality, the energy-dependent dielectric function of single crystal CsPbBr<sub>3</sub>  
203 nanowires at excitation densities above the Mott density is more complex.

204 Note that when the dephasing of the oscillator tends toward zero, a mode profile reminiscent of  
205 upper and lower polariton branches is retrieved. This suggests that lasing in a material with a  
206 resonance should be expected to have a negative dispersion for the lasing peaks, but that this does  
207 not necessarily correspond to polaritons.

208

209

210

## 211 **Supplementary References**

212 1. Maslov, A. V & Ning, C. Z. Reflection of guided modes in a semiconductor nanowire laser.  
213 *Cit. Appl. Phys. Lett* **83**, 1237 (2003).

214 2. Versteegh, M. A. M., Kuis, T., Stoof, H. T. C. & Dijkhuis, J. I. Ultrafast screening and carrier  
215 dynamics in ZnO: Theory and experiment. *Phys. Rev. B - Condens. Matter Mater. Phys.*  
216 **84**, (2011).

217 3. Becker, M. A. *et al.* Bright triplet excitons in caesium lead halide perovskites. *Nature* **553**,  
218 189–193 (2018).

219 4. Koch, S. W., Kira, M., Khitrova, G. & Gibbs, H. M. Semiconductor excitons in new light.  
220 *Nat. Mater.* **5**, 523–531 (2006).

- 221 5. Vigil-Fowler, D., Louie, S. G. & Lischner, J. Dispersion and line shape of plasmon satellites  
222 in one, two, and three dimensions. *Phys. Rev. B* **93**, 235446 (2016).
- 223 6. Caruso, F. & Giustino, F. Theory of electron-plasmon coupling in semiconductors. *Phys.*  
224 *Rev. B* **94**, 115208 (2016).
- 225 7. Haug, H. & Koch, S. W. *Quantum Theory of the Optical and Electronic Properties of*  
226 *Semiconductors*. (WORLD SCIENTIFIC, 2009). doi:10.1142/7184
- 227 8. Miyata, K. *et al.* Large Polarons in Lead Halide Perovskites. *Sci. Adv.* **3**, e1701217 (2017).
- 228 9. Boyd, R. W. *Nonlinear Optics*. (Academic Press, 2008).
- 229
